# Supplementary material for: Highly selective metal mediated ortho-alkylation of phenol. First platinum containing organometallic chromane analogues
Source: Royal Society of Chemistry journal article supplement (doi:10.1039/b712248a), 2007-01-01
Supplement: b712248a.pdf [file b712248a.pdf]

Supplementary Material

**Highly selective metal mediated *ortho*-alkylation of phenol. First platinum containing organometallic chromane analogues**

Vita M. Vecchio,<sup>a</sup> Michele Benedetti<sup>\*a</sup>, Danilo Migoni,<sup>a</sup> Sandra A. De Pascali,<sup>a</sup> Antonella Ciccarese,<sup>a</sup> Santo Marsigliante,<sup>a</sup> Francesco Capitelli<sup>b</sup> and Francesco P. Fanizzi<sup>\*a</sup>

**Table 1s. Selected bond lengths (Å) and angles (deg.) for [Pt(EtPh)(phen)], 1a.**

*Bond lengths*

---

|         |           |         |           |
|---------|-----------|---------|-----------|
| Pt1-N1  | 2.003(7)  | C5-C6   | 1.402(11) |
| Pt1-O1  | 2.013(6)  | C6-C10  | 1.403(11) |
| Pt1-C13 | 2.041(10) | C7-C8   | 1.383(14) |
| Pt1-N2  | 2.111(7)  | C8-C9   | 1.367(15) |
| O1-C16  | 1.349(10) | C9-C10  | 1.406(14) |
| N1-C1   | 1.318(11) | C10-C12 | 1.425(13) |
| N1-C5   | 1.364(10) | C11-C12 | 1.336(14) |
| N2-C7   | 1.324(11) | C13-C14 | 1.517(15) |
| N2-C6   | 1.365(10) | C14-C15 | 1.506(13) |
| C1-C2   | 1.393(14) | C15-C20 | 1.378(13) |
| C2-C3   | 1.351(14) | C15-C16 | 1.409(12) |
| C3-C4   | 1.409(13) | C16-C17 | 1.370(13) |
| C4-C5   | 1.409(12) | C17-C18 | 1.366(14) |
| C4-C11  | 1.431(13) | C18-C19 | 1.344(15) |
|         |           | C19-C20 | 1.401(15) |

| <i>Angles</i> |           |              |           |
|---------------|-----------|--------------|-----------|
|               |           | N2-C6-C5     | 116.3(7)  |
| N1-Pt1-O1     | 171.5(3)  | N2-C6-C10    | 122.1(8)  |
| N1-Pt1-C13    | 96.3(4)   | C5-C6-C10    | 121.6(8)  |
| O1-Pt1-C13    | 92.1(4)   | N2-C7-C8     | 122.1(10) |
| N1-Pt1-N2     | 80.7(3)   | C9-C8-C7     | 119.6(11) |
| O1-Pt1-N2     | 90.8(3)   | C8-C9-C10    | 120.1(10) |
| C13-Pt1-N2    | 176.5(4)  | C6-C10-C9    | 116.8(9)  |
| C16-O1-Pt1    | 116.5(5)  | C6-C10-C12   | 117.6(9)  |
| C1-N1-C5      | 118.2(8)  | C9-C10-C12   | 125.6(10) |
| C1-N1-Pt1     | 128.7(7)  | C12-C11-C4   | 120.4(11) |
| C5-N1-Pt1     | 113.2(6)  | C11-C12-C10  | 122.1(10) |
| C7-N2-C6      | 119.2(8)  | C14-C13-Pt1  | 114.8(8)  |
| C7-N2-Pt1     | 129.9(6)  | C15-C14-C13  | 113.8(8)  |
| C6-N2-Pt1     | 110.9(5)  | C15-C14-H17A | 106(7)    |
| N1-C1-C2      | 122.6(10) | C20-C15-C16  | 116.7(9)  |
| C3-C2-C1      | 120.4(10) | C20-C15-C14  | 124.7(9)  |
| C2-C3-C4      | 119.0(10) | C16-C15-C14  | 118.5(8)  |
| C5-C4-C3      | 117.4(9)  | O1-C16-C17   | 119.7(9)  |
| C5-C4-C11     | 119.4(9)  | O1-C16-C15   | 120.8(8)  |
| C3-C4-C11     | 123.2(10) | C17-C16-C15  | 119.4(9)  |
| N1-C5-C6      | 118.8(8)  | C18-C17-C16  | 122.1(11) |
| N1-C5-C4      | 122.3(8)  | C19-C18-C17  | 120.6(11) |
| C6-C5-C4      | 118.9(8)  | C18-C19-C20  | 118.2(10) |

C15-C20-C19      123.1(10)

---
